# Supplementary material for: Appraising spin-state energetics in transition metal complexes using double-hybrid models: accountability of SOS0-PBESCAN0-2(a) as a promising paradigm
Source: Royal Society of Chemistry journal article supplement (doi:10.1039/d0cp00807a), 2020-01-01
Supplement: d0cp00807a1.pdf [file d0cp00807a1.pdf]

Supporting Information for the paper entitled:

**Appraising spin-state energetics in transition metal complexes using double-hybrid models:  
Accountability of SOS0-PBESCAN0-2(a) as a promising paradigm**

Mojtaba Alipour\* and Tahereh Izadkhast

*Department of Chemistry, College of Sciences, Shiraz University, Shiraz 71946-84795, Iran*

**AUTHOR INFORMATION**

**\* Corresponding Author.**

E-mail: malipour@shirazu.ac.ir.

Phone: +98 71 36137160.

Fax: +98 71 36460788.

---

An illustrative sample of the definition of SOS0-PBESCAN0-2(a) in ORCA:

```
%method
Exchange X_PBE
Correlation C_SCAN
ScalHFX=0.7937
ScalDFX=0.2063
ScalMP2C=1.0
ScalLDAC=0.50
ScalGGAC=0.50
end
%MP2
DoSCS true
PS 0.6667
PT 0.0000
end
```
